# Supplementary material for: Case Report: Predicting the Range of Lamotrigine Concentration Using Pharmacokinetic Models Based on Monte Carlo Simulation: A Case Study of Antiepileptic Drug-Related Leukopenia
Source: PubMed Central journal article supplement (PMC8329375; doi:10.3389/fphar.2021.706329), 2021-07-20
Supplement: DataSheet1.pdf [file DataSheet1.pdf]

**Table S1** Predicted concentrations and probability of target attainment (PTA) (%) values needed to reach the target ranges of the steady-state serum concentrations ( $C_{ss}$ ) for various dosing regimens of lamotrigine (LTG) in adolescent Chinese epileptic patients weighing 60 kg based on Monte Carlo (MC) simulation in the scenario of LTG monotherapy.

| Dosing regimens (mg/qd) | Predicted concentrations (mg/L) |                 |            | PTA <sub>a</sub> (%) | PTA <sub>b</sub> (%) | Dosing regimens (mg/bid) | Predicted concentrations (mg/L) |                 |            | PTA <sub>a</sub> (%) | PTA <sub>b</sub> (%) |
|-------------------------|---------------------------------|-----------------|------------|----------------------|----------------------|--------------------------|---------------------------------|-----------------|------------|----------------------|----------------------|
|                         | Mean                            | 10th–90th range | percentile |                      |                      |                          | Mean                            | 10th–90th range | percentile |                      |                      |
| 25                      | 0.63                            | 0.30–1.04       |            | 0                    | 0                    | 12.5                     | 0.63                            | 0.45–0.82       |            | 0                    | 0                    |
| 50                      | 1.25                            | 0.59–2.07       |            | 0                    | 0                    | 25                       | 1.27                            | 0.90–1.64       |            | 0                    | 0                    |
| 75                      | 1.91                            | 0.90–3.14       |            | 14.21                | 0                    | 37.5                     | 1.90                            | 1.35–2.47       |            | 0.15                 | 0                    |
| 100                     | 2.53                            | 1.19–4.16       |            | 34.00                | 0                    | 50                       | 2.54                            | 1.79–3.28       |            | 23.98                | 0                    |
| 125                     | 3.15                            | 1.49–5.22       |            | 47.73                | 0                    | 62.5                     | 3.18                            | 2.24–4.11       |            | 57.85                | 0                    |
| 150                     | 3.79                            | 1.80–6.26       |            | 60.01                | 0                    | 75                       | 3.82                            | 2.72–4.94       |            | 80.69                | 0                    |
| 175                     | 4.44                            | 2.10–7.32       |            | 69.57                | 0                    | 87.5                     | 4.45                            | 3.15–5.76       |            | 93.22                | 0                    |
| 200                     | 5.09                            | 2.39–8.36       |            | 77.88                | 0                    | 100                      | 5.08                            | 3.61–6.57       |            | 98.31                | 0                    |
| 225                     | 5.71                            | 2.67–9.40       |            | 84.07                | 0                    | 112.5                    | 5.71                            | 4.03–7.39       |            | 99.71                | 0                    |
| 250                     | 6.32                            | 2.99–10.45      |            | 89.78                | 0                    | 125                      | 6.36                            | 4.50–8.20       |            | 99.94                | 0                    |
| 275                     | 7.03                            | 3.34–11.49      |            | 93.83                | 0                    | 137.5                    | 6.97                            | 4.92–9.03       |            | 99.96                | 0                    |
| 300                     | 7.62                            | 3.57–12.59      |            | 95.83                | 0                    | 150                      | 7.60                            | 5.40–9.85       |            | 100                  | 0                    |
| 325                     | 8.25                            | 3.88–13.59      |            | 95.23                | 0                    | 162.5                    | 8.24                            | 5.83–10.67      |            | 100                  | 0                    |
| 350                     | 8.87                            | 4.19–14.66      |            | 91.07                | 0                    | 175                      | 8.87                            | 6.27–11.44      |            | 99.99                | 0                    |
| 375                     | 9.57                            | 4.55–15.68      |            | 85.87                | 0.04                 | 187.5                    | 9.53                            | 6.76–12.33      |            | 99.92                | 0                    |
| 400                     | 10.14                           | 4.80–16.70      |            | 80.50                | 0.37                 | 200                      | 10.14                           | 7.13–13.13      |            | 98.86                | 0                    |
| 425                     | 10.77                           | 5.02–17.81      |            | 76.21                | 2.07                 | 212.5                    | 10.81                           | 7.62–13.97      |            | 96.77                | 0                    |
| 450                     | 11.46                           | 5.38–18.93      |            | 72.43                | 5.00                 | 225                      | 11.46                           | 8.09–14.79      |            | 91.66                | 0                    |
| 475                     | 12.13                           | 5.73–19.91      |            | 68.50                | 9.57                 | 237.5                    | 12.06                           | 8.55–15.63      |            | 84.54                | 0.04                 |
| 500                     | 12.69                           | 6.00–20.85      |            | 65.50                | 13.78                | 250                      | 12.70                           | 8.98–16.43      |            | 76.47                | 0.16                 |
| 525                     | 13.29                           | 6.29–21.93      |            | 62.40                | 17.76                | 262.5                    | 13.32                           | 9.35–17.19      |            | 67.80                | 0.60                 |
| 550                     | 13.93                           | 6.57–22.96      |            | 59.51                | 20.79                | 275                      | 13.92                           | 9.83–18.05      |            | 61.70                | 1.67                 |

|     |       |            |       |       |       |       |             |       |       |
|-----|-------|------------|-------|-------|-------|-------|-------------|-------|-------|
| 575 | 14.56 | 6.89–23.99 | 57.03 | 24.42 | 287.5 | 14.61 | 10.34–18.88 | 54.31 | 4.45  |
| 600 | 15.17 | 7.18–25.04 | 54.34 | 26.76 | 300   | 15.20 | 10.71–19.78 | 49.15 | 8.54  |
| 625 | 15.99 | 7.54–26.29 | 50.36 | 30.90 | 312.5 | 15.82 | 11.11–20.50 | 43.42 | 13.33 |
| 650 | 16.44 | 7.78–27.06 | 48.93 | 32.42 | 325   | 16.45 | 11.60–21.26 | 37.78 | 18.98 |
| 675 | 17.11 | 8.01–28.26 | 46.37 | 35.16 | 337.5 | 17.13 | 12.12–22.17 | 32.58 | 25.92 |
| 700 | 17.79 | 8.38–29.21 | 44.07 | 37.54 | 350   | 17.76 | 12.54–23.04 | 28.68 | 31.70 |

Note. qd: once-daily dose, bid: twice-daily dose, PTA<sub>a</sub>: the probability of target attainment (%) values needed to reach the steady-state serum concentrations within the range of 3–15 mg/L, PTA<sub>b</sub>: the probability of target attainment (%) values needed to reach the steady-state serum concentrations above 20 mg/L.

**Table S2** Predicted concentrations and probability of target attainment (PTA) (%) values needed to reach the target ranges of the steady-state serum concentrations ( $C_{ss}$ ) for various dosing regimens of lamotrigine (LTG) in adolescent Chinese epileptic patients weighing 60 kg based on Monte Carlo (MC) simulation in the scenario of concomitant therapy with LTG and valproate acid (VPA).

| Dosing regimens (mg/qd) | Predicted concentrations (mg/L) |                 |            | PTA <sub>a</sub> (%) | PTA <sub>b</sub> (%) | Dosing regimens (mg/bid) | Predicted concentrations (mg/L) |                 |            | PTA <sub>a</sub> (%) | PTA <sub>b</sub> (%) |
|-------------------------|---------------------------------|-----------------|------------|----------------------|----------------------|--------------------------|---------------------------------|-----------------|------------|----------------------|----------------------|
|                         | Mean                            | 10th–90th range | percentile |                      |                      |                          | Mean                            | 10th–90th range | percentile |                      |                      |
| 25                      | 1.27                            | 0.88–1.69       |            | 0                    | 0                    | 12.5                     | 1.27                            | 1.03–1.52       |            | 0                    | 0                    |
| 50                      | 2.54                            | 1.75–3.37       |            | 25.84                | 0                    | 25                       | 2.55                            | 2.06–3.03       |            | 11.30                | 0                    |
| 75                      | 3.80                            | 2.62–5.06       |            | 77.31                | 0                    | 37.5                     | 3.82                            | 3.09–4.53       |            | 92.98                | 0                    |
| 100                     | 5.10                            | 3.52–6.76       |            | 97.74                | 0                    | 50                       | 5.09                            | 4.14–6.05       |            | 99.97                | 0                    |
| 125                     | 6.37                            | 4.38–8.46       |            | 99.92                | 0                    | 62.5                     | 6.38                            | 5.19–7.62       |            | 100                  | 0                    |
| 150                     | 7.65                            | 5.27–10.18      |            | 100                  | 0                    | 75                       | 7.66                            | 6.22–9.13       |            | 100                  | 0                    |
| 175                     | 8.93                            | 6.14–11.84      |            | 99.96                | 0                    | 87.5                     | 8.90                            | 7.22–10.58      |            | 100                  | 0                    |
| 200                     | 10.23                           | 7.08–13.58      |            | 97.85                | 0                    | 100                      | 10.20                           | 8.28–12.14      |            | 99.95                | 0                    |
| 225                     | 11.42                           | 7.88–15.21      |            | 88.27                | 0.01                 | 112.5                    | 11.46                           | 9.29–13.64      |            | 98.17                | 0                    |
| 250                     | 12.78                           | 8.83–16.89      |            | 73.47                | 0.42                 | 125                      | 12.71                           | 10.33–15.15     |            | 88.63                | 0.02                 |
| 275                     | 14.00                           | 9.66–18.57      |            | 60.98                | 3.50                 | 137.5                    | 14.01                           | 11.35–16.65     |            | 68.50                | 0.16                 |

|     |       |             |       |       |       |       |             |       |       |
|-----|-------|-------------|-------|-------|-------|-------|-------------|-------|-------|
| 300 | 15.24 | 10.50–20.28 | 49.91 | 11.76 | 150   | 15.29 | 12.41–18.19 | 45.63 | 2.35  |
| 325 | 16.58 | 11.41–22.00 | 38.99 | 22.67 | 162.5 | 16.58 | 13.44–19.74 | 27.22 | 8.35  |
| 350 | 17.84 | 12.32–23.69 | 29.61 | 33.22 | 175   | 17.81 | 14.41–21.23 | 14.89 | 20.78 |
| 375 | 19.13 | 13.20–25.37 | 22.11 | 42.51 | 187.5 | 19.08 | 15.52–22.65 | 6.75  | 37.21 |
| 400 | 20.41 | 13.98–27.17 | 15.79 | 50.65 | 200   | 20.41 | 16.53–24.28 | 2.75  | 54.29 |
| 425 | 21.76 | 15.01–28.86 | 9.91  | 58.71 | 212.5 | 21.65 | 17.65–25.71 | 1.12  | 69.06 |
| 450 | 22.92 | 15.75–30.50 | 6.90  | 65.15 | 225   | 22.95 | 18.60–27.35 | 0.34  | 80.03 |
| 475 | 24.21 | 16.66–32.17 | 3.84  | 71.90 | 237.5 | 24.21 | 19.58–28.86 | 0.18  | 87.51 |
| 500 | 25.31 | 17.45–33.73 | 2.78  | 77.06 | 250   | 25.47 | 20.61–30.33 | 0.04  | 92.88 |
| 525 | 26.82 | 18.49–35.74 | 1.26  | 83.12 | 262.5 | 26.73 | 21.74–31.90 | 0.01  | 96.23 |
| 550 | 28.03 | 19.34–37.27 | 0.63  | 87.29 | 275   | 27.95 | 22.74–33.28 | 0.02  | 98.17 |
| 575 | 29.37 | 20.16–39.03 | 0.38  | 90.65 | 287.5 | 29.31 | 23.80–34.93 | 0     | 99.20 |
| 600 | 30.59 | 21.17–40.58 | 0.21  | 93.58 | 300   | 30.49 | 24.61–36.35 | 0     | 99.64 |
| 625 | 31.75 | 21.88–42.35 | 0.04  | 95.11 | 312.5 | 31.86 | 25.84–37.96 | 0     | 99.86 |
| 650 | 33.03 | 22.79–43.92 | 0.04  | 96.89 | 325   | 33.09 | 26.75–39.40 | 0     | 99.92 |
| 675 | 34.50 | 23.73–45.82 | 0.03  | 98.14 | 337.5 | 34.36 | 27.84–40.99 | 0     | 99.93 |
| 700 | 35.82 | 24.63–47.47 | 0.02  | 98.65 | 350   | 35.68 | 29.03–42.56 | 0     | 99.98 |

Note. qd: once-daily dose, bid: twice-daily dose, PTA<sub>a</sub>: the probability of target attainment (%) values needed to reach the steady-state serum concentrations within the range of 3–15 mg/L, PTA<sub>b</sub>: the probability of target attainment (%) values needed to reach the steady-state serum concentrations above 20 mg/L.

**Table S3** Predicted concentrations and probability of target attainment (PTA) (%) values needed to reach the target ranges of the steady-state serum concentrations ( $C_{ss}$ ) for various dosing regimens of lamotrigine (LTG) in adolescent Chinese epileptic patients weighing 60 kg based on Monte Carlo (MC) simulation in the scenario of concomitant therapy with LTG and enzyme inducer (IND).

| Dosing regimens (mg/qd) | Predicted concentrations (mg/L) |                 |            | PTA <sub>a</sub> (%) | PTA <sub>b</sub> (%) | Dosing regimens (mg/bid) | Predicted concentrations (mg/L) |                 |            | PTA <sub>a</sub> (%) | PTA <sub>b</sub> (%) |
|-------------------------|---------------------------------|-----------------|------------|----------------------|----------------------|--------------------------|---------------------------------|-----------------|------------|----------------------|----------------------|
|                         | Mean                            | 10th–90th range | percentile |                      |                      |                          | Mean                            | 10th–90th range | percentile |                      |                      |

|     |       |            |       |       |       |       |            |       |      |
|-----|-------|------------|-------|-------|-------|-------|------------|-------|------|
| 25  | 0.37  | 0.09–0.80  | 0     | 0     | 12.5  | 0.37  | 0.21–0.55  | 0     | 0    |
| 50  | 0.75  | 0.19–1.59  | 0     | 0     | 25    | 0.75  | 0.41–1.10  | 0     | 0    |
| 75  | 1.12  | 0.28–2.39  | 0.20  | 0     | 37.5  | 1.12  | 0.62–1.65  | 0     | 0    |
| 100 | 1.48  | 0.38–3.18  | 12.99 | 0     | 50    | 1.49  | 0.83–2.20  | 0     | 0    |
| 125 | 1.86  | 0.48–3.96  | 23.19 | 0     | 62.5  | 1.86  | 1.04–2.74  | 2.72  | 0    |
| 150 | 2.23  | 0.56–4.79  | 29.98 | 0     | 75    | 2.24  | 1.25–3.30  | 20.66 | 0    |
| 175 | 2.62  | 0.66–5.57  | 35.96 | 0     | 87.5  | 2.62  | 1.46–3.86  | 36.96 | 0    |
| 200 | 3.00  | 0.76–6.39  | 41.13 | 0     | 100   | 2.99  | 1.67–4.39  | 47.93 | 0    |
| 225 | 3.38  | 0.85–7.20  | 45.84 | 0     | 112.5 | 3.36  | 1.87–4.96  | 57.35 | 0    |
| 250 | 3.75  | 0.94–7.95  | 49.72 | 0     | 125   | 3.73  | 2.09–5.51  | 64.04 | 0    |
| 275 | 4.12  | 1.05–8.78  | 53.31 | 0     | 137.5 | 4.10  | 2.30–6.02  | 71.66 | 0    |
| 300 | 4.48  | 1.13–9.55  | 55.90 | 0     | 150   | 4.48  | 2.50–6.59  | 79.08 | 0    |
| 325 | 4.87  | 1.24–10.31 | 59.16 | 0     | 162.5 | 4.87  | 2.71–7.13  | 84.51 | 0    |
| 350 | 5.21  | 1.32–11.12 | 61.80 | 0     | 175   | 5.25  | 2.93–7.69  | 88.68 | 0    |
| 375 | 5.60  | 1.40–11.97 | 63.78 | 0     | 187.5 | 5.59  | 3.13–8.20  | 91.99 | 0    |
| 400 | 5.91  | 1.49–12.72 | 64.98 | 0     | 200   | 5.98  | 3.33–8.80  | 94.58 | 0    |
| 425 | 6.30  | 1.62–13.46 | 65.25 | 0     | 212.5 | 6.32  | 3.56–9.31  | 96.59 | 0    |
| 450 | 6.73  | 1.71–14.22 | 64.19 | 0     | 225   | 6.74  | 3.76–9.88  | 97.99 | 0    |
| 475 | 7.10  | 1.78–15.18 | 62.12 | 0.02  | 237.5 | 7.10  | 3.97–10.47 | 98.80 | 0    |
| 500 | 7.50  | 1.86–15.99 | 60.63 | 0.16  | 250   | 7.48  | 4.16–11.01 | 99.04 | 0    |
| 525 | 7.86  | 1.98–16.76 | 60.16 | 0.69  | 262.5 | 7.84  | 4.35–11.56 | 99.66 | 0    |
| 550 | 8.19  | 2.07–17.42 | 59.90 | 2.04  | 275   | 8.17  | 4.57–12.06 | 99.72 | 0    |
| 575 | 8.60  | 2.16–18.43 | 60.35 | 4.45  | 287.5 | 8.57  | 4.81–12.64 | 99.50 | 0    |
| 600 | 8.91  | 2.26–19.08 | 59.53 | 6.89  | 300   | 9.01  | 5.02–13.22 | 98.60 | 0    |
| 625 | 9.35  | 2.37–19.89 | 59.28 | 9.77  | 312.5 | 9.34  | 5.21–13.71 | 97.26 | 0    |
| 650 | 9.69  | 2.44–20.60 | 58.59 | 11.71 | 325   | 9.61  | 5.38–14.19 | 95.11 | 0    |
| 675 | 10.09 | 2.54–21.58 | 59.14 | 14.15 | 337.5 | 10.04 | 5.60–14.76 | 91.58 | 0.01 |
| 700 | 10.49 | 2.66–22.26 | 58.80 | 15.87 | 350   | 10.46 | 5.87–15.27 | 87.68 | 0.02 |

Note. qd: once-daily dose, bid: twice-daily dose, PTA<sub>a</sub>: the probability of target attainment (%) values needed to reach the steady-state serum concentrations within the range of 3–15 mg/L, PTA<sub>b</sub>: the probability of target attainment (%) values needed to reach the steady-state serum concentrations above 20 mg/L.

**Table S4** Predicted concentrations and probability of target attainment (PTA) (%) values needed to reach the target ranges of the steady-state serum concentrations ( $C_{ss}$ ) for various dosing regimens of lamotrigine (LTG) in adolescent Chinese epileptic patients weighing 60 kg based on Monte Carlo (MC) simulation in the scenario of concomitant therapy with LTG, valproate acid (VPA), and enzyme inducer (IND).

| Dosing regimens (mg/qd) | Predicted concentrations (mg/L) |                 |            | PTA <sub>a</sub> (%) | PTA <sub>b</sub> (%) | Dosing regimens (mg/bid) | Predicted concentrations (mg/L) |                 |            | PTA <sub>a</sub> (%) | PTA <sub>b</sub> (%) |
|-------------------------|---------------------------------|-----------------|------------|----------------------|----------------------|--------------------------|---------------------------------|-----------------|------------|----------------------|----------------------|
|                         | Mean                            | 10th–90th range | percentile |                      |                      |                          | Mean                            | 10th–90th range | percentile |                      |                      |
| 25                      | 0.74                            | 0.40–1.16       |            | 0                    | 0                    | 12.5                     | 0.75                            | 0.55–0.94       |            | 0                    | 0                    |
| 50                      | 1.50                            | 0.79–2.31       |            | 0.02                 | 0                    | 25                       | 1.50                            | 1.11–1.88       |            | 0                    | 0                    |
| 75                      | 2.25                            | 1.20–3.48       |            | 24.06                | 0                    | 37.5                     | 2.25                            | 1.67–2.83       |            | 4.54                 | 0                    |
| 100                     | 3.00                            | 1.62–4.63       |            | 46.17                | 0                    | 50                       | 3.01                            | 2.21–3.79       |            | 50.53                | 0                    |
| 125                     | 3.74                            | 2.00–5.80       |            | 62.42                | 0                    | 62.5                     | 3.74                            | 2.77–4.71       |            | 82.02                | 0                    |
| 150                     | 4.46                            | 2.39–6.92       |            | 75.32                | 0                    | 75                       | 4.50                            | 3.33–5.67       |            | 96.43                | 0                    |
| 175                     | 5.24                            | 2.79–8.09       |            | 85.87                | 0                    | 87.5                     | 5.24                            | 3.89–6.61       |            | 99.48                | 0                    |
| 200                     | 5.99                            | 3.18–9.30       |            | 92.85                | 0                    | 100                      | 6.02                            | 4.44–7.58       |            | 99.95                | 0                    |
| 225                     | 6.71                            | 3.54–10.40      |            | 96.93                | 0                    | 112.5                    | 6.76                            | 5.01–8.50       |            | 99.98                | 0                    |
| 250                     | 7.50                            | 4.03–11.52      |            | 98.64                | 0                    | 125                      | 7.47                            | 5.52–9.41       |            | 100                  | 0                    |
| 275                     | 8.22                            | 4.40–12.72      |            | 98.92                | 0                    | 137.5                    | 8.23                            | 6.08–10.34      |            | 100                  | 0                    |
| 300                     | 9.05                            | 4.80–13.92      |            | 96.05                | 0                    | 150                      | 9.00                            | 6.64–11.36      |            | 99.99                | 0                    |
| 325                     | 9.77                            | 5.24–15.07      |            | 89.57                | 0                    | 162.5                    | 9.75                            | 7.24–12.24      |            | 99.79                | 0                    |
| 350                     | 10.53                           | 5.61–16.22      |            | 82.34                | 0.12                 | 175                      | 10.45                           | 7.74–13.17      |            | 99.10                | 0                    |
| 375                     | 11.20                           | 5.98–17.28      |            | 76.63                | 1.03                 | 187.5                    | 11.23                           | 8.31–14.16      |            | 95.71                | 0                    |
| 400                     | 11.95                           | 6.38–18.38      |            | 71.10                | 3.47                 | 200                      | 12.00                           | 8.82–15.15      |            | 88.79                | 0.02                 |
| 425                     | 12.76                           | 6.84–19.74      |            | 65.96                | 8.68                 | 212.5                    | 12.73                           | 9.50–15.96      |            | 80.16                | 0.08                 |

|     |       |             |       |       |       |       |             |       |       |
|-----|-------|-------------|-------|-------|-------|-------|-------------|-------|-------|
| 450 | 13.50 | 7.21–20.89  | 61.64 | 13.93 | 225   | 13.47 | 9.93–16.97  | 69.28 | 0.36  |
| 475 | 14.22 | 7.60–22.02  | 57.98 | 19.43 | 237.5 | 14.20 | 10.48–17.92 | 59.69 | 1.68  |
| 500 | 14.94 | 7.98–23.12  | 54.50 | 23.70 | 250   | 15.00 | 11.09–18.88 | 50.36 | 4.20  |
| 525 | 15.76 | 8.39–24.34  | 50.60 | 27.94 | 262.5 | 15.74 | 11.64–19.82 | 42.54 | 8.68  |
| 550 | 16.45 | 8.80–25.37  | 46.46 | 30.95 | 275   | 16.49 | 12.12–20.76 | 34.94 | 15.56 |
| 575 | 17.25 | 9.25–26.66  | 43.63 | 35.06 | 287.5 | 17.26 | 12.79–21.76 | 28.31 | 23.08 |
| 600 | 18.00 | 9.69–27.80  | 40.33 | 38.07 | 300   | 17.96 | 13.34–22.65 | 23.47 | 30.30 |
| 625 | 18.87 | 10.03–29.04 | 36.92 | 42.14 | 312.5 | 18.70 | 13.75–23.65 | 18.33 | 37.98 |
| 650 | 19.45 | 10.44–30.02 | 34.75 | 43.53 | 325   | 19.56 | 14.45–24.63 | 13.40 | 46.04 |
| 675 | 20.31 | 10.87–31.23 | 31.55 | 47.27 | 337.5 | 20.23 | 14.92–25.51 | 10.35 | 51.48 |
| 700 | 20.95 | 11.29–32.38 | 29.09 | 49.62 | 350   | 20.91 | 15.44–26.37 | 7.48  | 57.03 |

Note. qd: once-daily dose, bid: twice-daily dose, PTA<sub>a</sub>: the probability of target attainment (%) values needed to reach the steady-state serum concentrations within the range of 3–15 mg/L, PTA<sub>b</sub>: the probability of target attainment (%) values needed to reach the steady-state serum concentrations above 20 mg/L.

**Table S5** Predicted concentrations of lamotrigine (LTG) and the calculated probability of target attainment (PTA) (%) values needed to reach steady-state serum concentrations ( $C_{ss}$ ) within the target range (3–15 mg/L), of the response to lamotrigine (LTG) for dosing regimens of 25 mg/bid to 125 mg/bid by adolescent Chinese epileptic patients weighing 60 kg in a 10,000-virtual patient Monte Carlo (MC) simulation along with the measured LTG concentrations of a 15-year-old female epileptic Chinese patient weighing 60 kg.

| Day | Dosing regimens of LTG (mg/bid) | Dosing regimens of VPA (g/qd) | Predicted LTG concentrations (mg/L) |                            | PTA (%) | The observed LTG concentrations of the patient (mg/L) |
|-----|---------------------------------|-------------------------------|-------------------------------------|----------------------------|---------|-------------------------------------------------------|
|     |                                 |                               | Mean                                | 10th–90th percentile range |         |                                                       |
| 1   | 25                              | 0.0                           | 1.27                                | 0.90–1.64                  | 0.00    | NA                                                    |
| 2   | 25                              | 0.0                           | 1.27                                | 0.90–1.64                  | 0.00    | NA                                                    |
| 3   | 25                              | 0.5                           | 2.55                                | 2.06–3.03                  | 11.30   | NA                                                    |
| 4   | 25                              | 0.5                           | 2.55                                | 2.06–3.03                  | 11.30   | NA                                                    |
| 5   | 25                              | 0.5                           | 2.55                                | 2.06–3.03                  | 11.30   | NA                                                    |
| 6   | 50                              | 0.5                           | 5.09                                | 4.14–6.05                  | 99.97   | NA                                                    |

---

|    |     |     |       |             |       |       |
|----|-----|-----|-------|-------------|-------|-------|
| 7  | 50  | 0.5 | 5.09  | 4.14–6.05   | 99.97 | NA    |
| 8  | 50  | 0.5 | 5.09  | 4.14–6.05   | 99.97 | NA    |
| 9  | 50  | 0.5 | 5.09  | 4.14–6.05   | 99.97 | 4.57  |
| 10 | 75  | 0.5 | 7.66  | 6.22–9.13   | 100   | NA    |
| 11 | 75  | 0.5 | 7.66  | 6.22–9.13   | 100   | NA    |
| 12 | 75  | 0.5 | 7.66  | 6.22–9.13   | 100   | NA    |
| 13 | 100 | 0.5 | 10.20 | 8.28–12.14  | 99.95 | NA    |
| 14 | 100 | 0.5 | 10.20 | 8.28–12.14  | 99.95 | NA    |
| 15 | 100 | 0.5 | 10.20 | 8.28–12.14  | 99.95 | NA    |
| 16 | 100 | 0.5 | 10.20 | 8.28–12.14  | 99.95 | NA    |
| 17 | 100 | 0.5 | 10.20 | 8.28–12.14  | 99.95 | 8.32  |
| 18 | 100 | 0.5 | 10.20 | 8.28–12.14  | 99.95 | NA    |
| 19 | 100 | 0.5 | 10.20 | 8.28–12.14  | 99.95 | NA    |
| 20 | 100 | 0.5 | 10.20 | 8.28–12.14  | 99.95 | NA    |
| 21 | 125 | 0.5 | 12.71 | 10.33–15.15 | 88.63 | NA    |
| 22 | 125 | 0.5 | 12.71 | 10.33–15.15 | 88.63 | NA    |
| 23 | 125 | 0.5 | 12.71 | 10.33–15.15 | 88.63 | NA    |
| 24 | 125 | 0.5 | 12.71 | 10.33–15.15 | 88.63 | NA    |
| 25 | 125 | 0.5 | 12.71 | 10.33–15.15 | 88.63 | NA    |
| 26 | 125 | 0.5 | 12.71 | 10.33–15.15 | 88.63 | NA    |
| 27 | 125 | 0.5 | 12.71 | 10.33–15.15 | 88.63 | NA    |
| 28 | 125 | 0.5 | 12.71 | 10.33–15.15 | 88.63 | 10.95 |
| 29 | 125 | 0.5 | 12.71 | 10.33–15.15 | 88.63 | NA    |
| 30 | 125 | 0.5 | 12.71 | 10.33–15.15 | 88.63 | NA    |
| 31 | 125 | 0.0 | 6.36  | 4.50–8.20   | 99.94 | NA    |
| 32 | 125 | 0.0 | 6.36  | 4.50–8.20   | 99.94 | NA    |
| 33 | 125 | 0.0 | 6.36  | 4.50–8.20   | 99.94 | NA    |
| 34 | 125 | 0.0 | 6.36  | 4.50–8.20   | 99.94 | NA    |

---

---

|    |     |     |      |           |       |      |
|----|-----|-----|------|-----------|-------|------|
| 35 | 125 | 0.0 | 6.36 | 4.50–8.20 | 99.94 | 7.47 |
| 36 | 125 | 0.0 | 6.36 | 4.50–8.20 | 99.94 | NA   |
| 37 | 125 | 0.0 | 6.36 | 4.50–8.20 | 99.94 | NA   |
| 38 | 125 | 0.0 | 6.36 | 4.50–8.20 | 99.94 | NA   |

---

Note. VPA: valproate acid, qd: once-daily dose, bid: twice-daily dose, NA: the therapeutic drug monitoring results of LTG are not available.
